# Supplementary material for: Live cell imaging reveals marked variability in myoblast proliferation and fate
Source: PubMed Central journal article supplement (PMC3712004; doi:10.1186/2044-5040-3-10), 2013-05-02

# Supplemental Fig 3

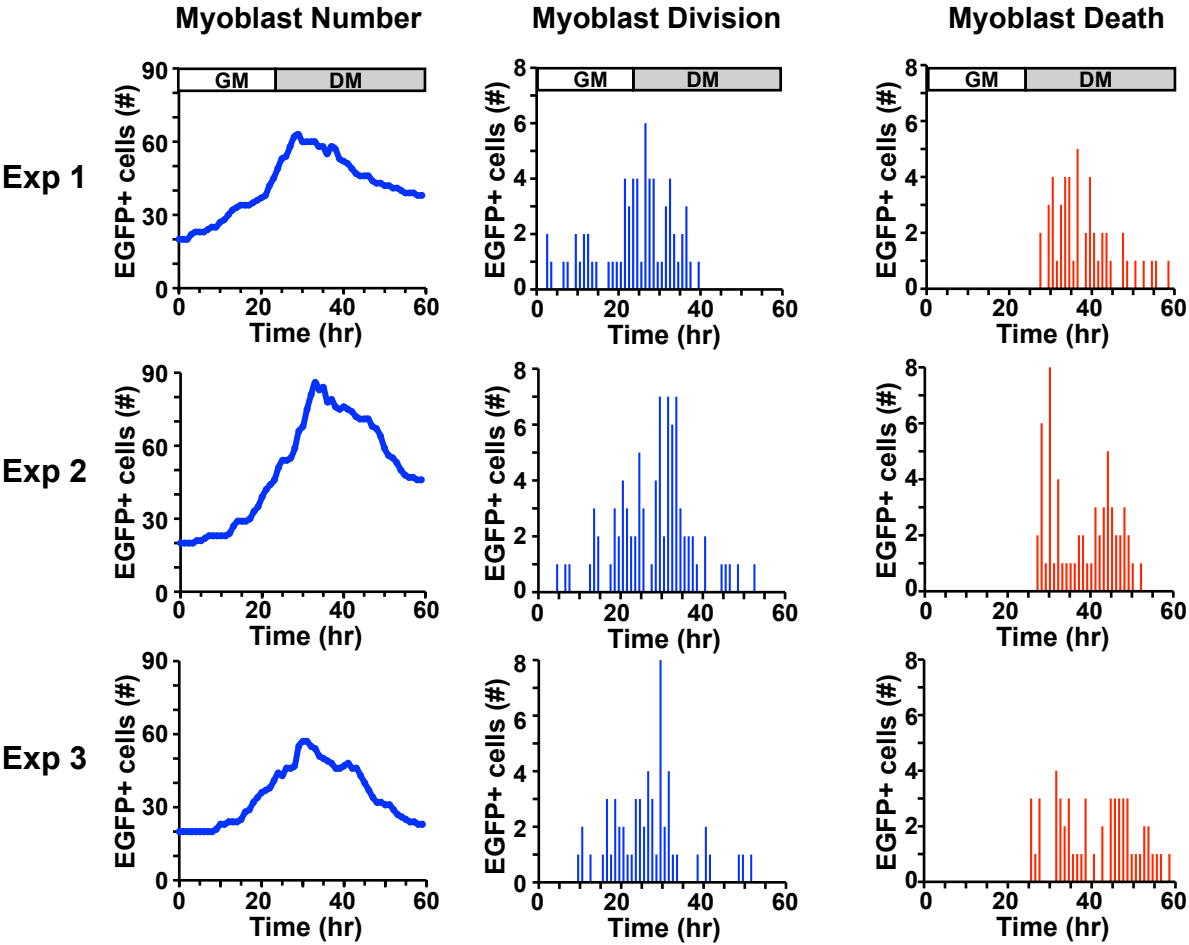

Supplement: 2044-5040-3-10-S5.pdf [file 2044-5040-3-10-S5.pdf]
